# Supplementary material for: Sequence analysis of GerM and SpoVS, uncharacterized bacterial ‘sporulation’ proteins with widespread phylogenetic distribution
Source: PubMed Central journal article supplement — Bioinformatics. 2008 Jun 17;24(16):1793–7. doi: 10.1093/bioinformatics/btn314 (PMC2732212; doi:10.1093/bioinformatics/btn314), 2008-06-17
Supplement: btn314_2.pdf [file btn314_2.pdf]

## Supplementary Figure 2: Sequence alignment of the GMAD1 domain.

The alignment was formatted with Jalview (Clamp *et al.*, 2004) and annotated with the PISPRED (Jones, 1999) prediction for the top sequence.

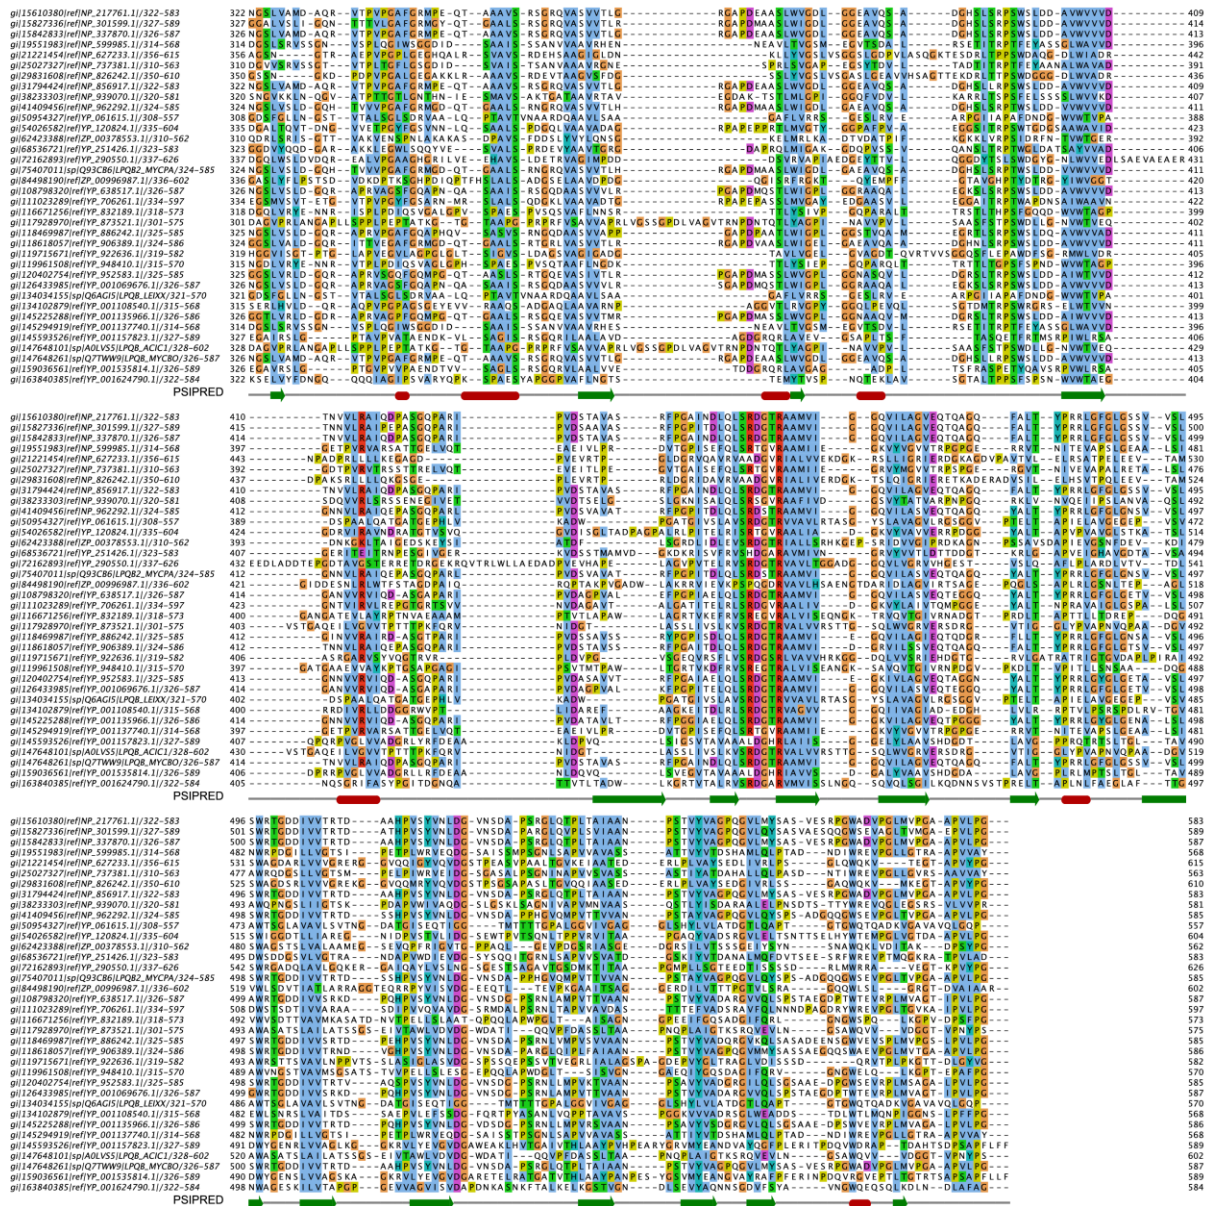

## References

- Clamp M., Cuff J., Searle S. M. & Barton G. J. (2004) The Jalview Java alignment editor. *Bioinformatics* 20, 426-427.
- Jones D. T. (1999) Protein secondary structure prediction based on position-specific scoring matrices. *J. Mol. Biol.* 292, 195-202.
