# Supplementary material for: Sequence analysis of GerM and SpoVS, uncharacterized bacterial ‘sporulation’ proteins with widespread phylogenetic distribution
Source: PubMed Central journal article supplement — Bioinformatics. 2008 Jun 17;24(16):1793–7. doi: 10.1093/bioinformatics/btn314 (PMC2732212; doi:10.1093/bioinformatics/btn314), 2008-06-17

**Supplementary Fig. 5: Electrostatic potential mapped onto the solvent-accessible surface of the comparative dimer model of the *Thermotoga maritima* SpoVS homologue.**

This figure was made with PyMOL (<http://pymol.sourceforge.net>)

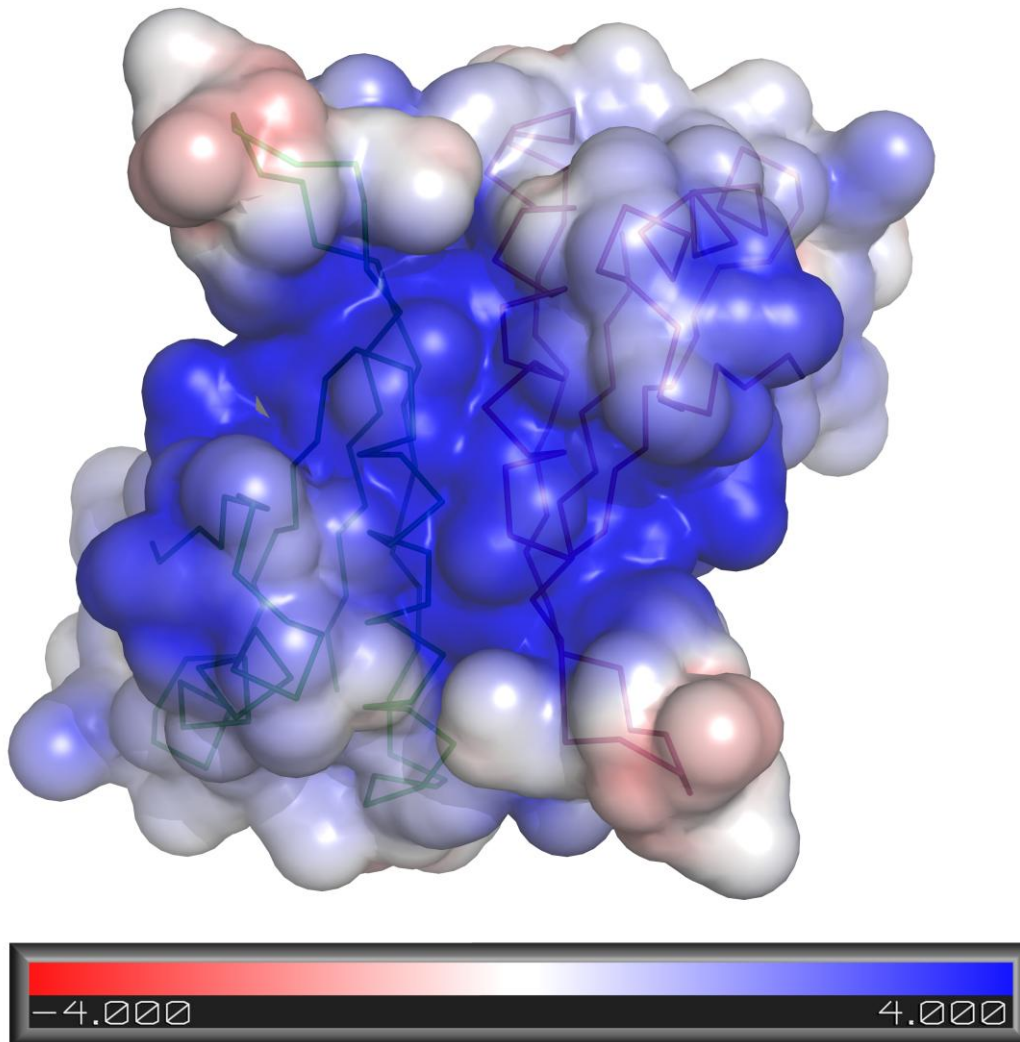

Supplement: btn314_5.pdf [file btn314_5.pdf]
